# Supplementary material for: Fully integrated wearable sensor arrays for multiplexed in situ perspiration analysis
Source: Springer Nature journal article supplement (doi:10.1038/nature16521), 2016-01-26
Supplement: 41586_2016_BFnature16521_MOESM81_ESM.pdf [file 41586_2016_BFnature16521_MOESM81_ESM.pdf]

**Supplementary Table 1. Selected wearable sweat biosensors.**

| Platform                         | Recognition element                                       | Methods                        | Analyte                                                          | References |
|----------------------------------|-----------------------------------------------------------|--------------------------------|------------------------------------------------------------------|------------|
| Textiles                         | Bromocresol purple (BCP)                                  | Colorimetry                    | pH                                                               | 1          |
| Cotton                           | Bare carbon                                               | Amperometry                    | $\beta$ -nicotinamide adenine dinucleotide and hydrogen peroxide | 2          |
| Polyimide/Lycra blend            | Sodium ionophore                                          | Potentiometry                  | Sodium                                                           | 3          |
| Textiles, Polyimide/Lycra blend  | Sodium ionophore, bromocresol purple (BCP),               | Potentiometry<br>Colorimetry   | Sodium, pH                                                       | 4          |
| Parylene                         | Lactate oxidase                                           | Transistor based conductometry | Lactate                                                          | 5          |
| Poly(methyl-methacrylate)        | Bromocresol purple (BCP)                                  | Colorimetry                    | pH                                                               | 6          |
| Cotton yarns                     | Nonactin, valinomycin, and tridodecylamine                | Potentiometry                  | Ammonium, potassium and pH                                       | 7          |
| Polyester                        | Ag/AgCl                                                   | Potentiometry                  | Chloride                                                         | 8          |
| Elastomeric stamps               | Carbon                                                    | Voltammetry                    | Uric acid                                                        | 9          |
| Temporary tattoo                 | Lactate oxidase                                           | Amperometry                    | Lactate                                                          | 10         |
| Temporary tattoo                 | Polyaniline                                               | Potentiometry                  | pH                                                               | 11         |
| Temporary tattoo                 | Ammonium ionophore                                        | Potentiometry                  | Ammonium                                                         | 12         |
| Temporary tattoo                 | Sodium ionophore                                          | Potentiometry                  | Sodium                                                           | 13         |
| Temporary tattoo                 | Bismuth                                                   | Stripping voltammetry          | Zinc                                                             | 14         |
| Polyimide adhesive patch         | Sodium ionophore                                          | Potentiometry                  | Sodium                                                           | 15         |
| Screen printed carbon electrodes | Sodium ionophore, hydrogen ionophore, and lactate oxidase | Potentiometry, amperometry     | pH, sodium and lactate                                           | 16         |

## Supplementary discussions for selection of the target analytes

The panel of target analytes and skin temperature is selected based on their informative role in understanding an individual's physiological state. For example, excessive loss of sodium and potassium in sweat could result in hyponatremia, hypokalemia, muscle cramps or dehydration<sup>17,18</sup>. Sweat sodium and potassium could be useful biomarkers for electrolyte imbalance<sup>18</sup> and Cystic Fibrosis diagnosis<sup>19,20</sup>. Sweat glucose is shown to come from blood glucose<sup>21</sup>. Glucose monitoring is the key to managing diabetes, and several papers have reported that sweat glucose levels are correlated with blood glucose levels<sup>22-24</sup>. As such, sweat glucose sensing could potentially serve as a non-invasive way for blood glucose monitoring. Sweat lactate analysis is important for many potential clinical applications<sup>25</sup>. For instance, sweat lactate is shown to potentially be a very useful early warning indicator of pressure ischemia<sup>26-29</sup>. It may also be used to monitor physical performance since lactate is a product of anaerobic metabolism. It was proposed that detection of sweat lactate could offer a non-invasive way for blood lactate monitoring; however, very poor correlation was found between blood and sweat lactate levels<sup>30,31</sup>. There are also reports on using sweat lactate as a biomarker for panic disorder or Frey's syndrome<sup>32,33</sup>. Skin temperature is clinically informative of a variety of diseases and skin injuries such as pressure ulcers<sup>34,35</sup>. It is an effective indicator of human sensations and provides a lot of clinical information about cardiovascular health, cognitive state and malignancy<sup>34</sup>. Additionally, skin temperature measurements are necessary to compensate and to eliminate the influence of temperature variation on the chemical sensors' readings through a built-in signal processing functionality.

## References

1. Morris, D. *et al.* Bio-sensing textile based patch with integrated optical detection system for sweat monitoring. *Sens. Actuators B: Chem.* **139**, 231–236 (2009).
2. Yang, Y. L. *et al.* Thick-film textile-based amperometric sensors and biosensors. *Analyst* **135**, 1230–1234 (2010).
3. Schazmann, B. *et al.* A wearable electrochemical sensor for the real-time measurement of sweat sodium concentration. *Anal. Methods* **2**, 342–348 (2010).
4. Coyle, S. *et al.* BIOTEX—Biosensing textiles for personalised healthcare management. *IEEE Trans. Inf. Technol. Biomed.* **14**, 364–370 (2010).
5. Khodagholy, D. *et al.* Organic electrochemical transistor incorporating an ionogel as a solid state electrolyte for lactate sensing. *J. Mater. Chem.* **22**, 4440–4443 (2012).

6. Curto, V. F. *et al.* Concept and development of an autonomous wearable micro-fluidic platform for real time pH sweat analysis. *Sens. Actuators B Chem.* **175**, 263–270 (2012).
7. Guinovart, T. *et al.* Potentiometric sensors using cotton yarns, carbon nanotubes and polymeric membranes. *Analyst* **138**, 5208–5215 (2013).
8. Gonzalo-Ruiz, J. *et al.* Early determination of cystic fibrosis by electrochemical chloride quantification in sweat. *Biosens. Bioelectron.* **24**, 1788–1791 (2009).
9. Windmiller, J. R. *et al.* Stamp transfer electrodes for electrochemical sensing on non-planar and oversized surfaces. *Analyst* **137**, 1570–1575 (2012).
10. Jia, W. *et al.* Electrochemical tattoo biosensors for real-time noninvasive lactate monitoring in human perspiration. *Anal. Chem.* **85**, 6553–6658 (2013).
11. Bandodkar, A. J. *et al.* Tattoo-based potentiometric ion-selective sensors for epidermal pH monitoring. *Analyst* **138**, 123–128 (2013).
12. Guinovart, T. *et al.* A potentiometric tattoo sensor for monitoring ammonium in sweat. *Analyst* **138**, 7031–7038 (2013).
13. Bandodkar, A. J. *et al.* Epidermal tattoo potentiometric sodium sensors with wireless signal transduction for continuous non-invasive sweat monitoring. *Biosens. Bioelectron.* **54**, 603–609 (2014).
14. Kim, J. *et al.* Wearable temporary tattoo sensor for real-time trace metal monitoring in human sweat. *Electrochem. Commun.* **51**, 41–45 (2015).
15. Rose, D. P. *et al.* Adhesive RFID sensor patch for monitoring of sweat electrolytes. *IEEE Transact. Biomed. Eng.* **62**, 1457–1465 (2015).
16. Bembnowicz, P. *et al.* Wearable electronic sensor for potentiometric and amperometric measurements. *IEEE International Conference on Body Sensor Networks (BSN)*, 1–5, 2013.
17. Speedy, D. B., Noakes, T. D., Schneider, C. Exercise-associated hyponatremia: a review. *Emerg. Med.* **13**, 17–27 (2001).
18. Bergeron, M. F. Heat cramps: fluid and electrolyte challenges during tennis in the heat. *J. Sci. Med. Sport* **6**, 19–27 (2003).
19. Green, A., Dodds, P., Pennock, C. A study of sweat sodium and chloride; criteria for the diagnosis of cystic fibrosis. *Ann. Clin. Biochem.* **22**, 171–174 (1985).
20. Reddy, M. M., Quinton, P. M. Cytosolic potassium controls CFTR deactivation in human sweat duct. *Am. J. Physiol. Cell Physiol.* **291**, C122–C129 (2006).
21. Boysen, T. C., Yanagawa, S., Sato, F., Sato, K. A modified anaerobic method of sweat collection. *J. Appl. Physiol.* **56**, 1302–1307 (1984).

22. Talary, M. S., Dewarrat, F., Huber, D., Caduff, A. In vivo life sign application of dielectric spectroscopy and non-invasive glucose monitoring. *J. Non-Cryst. Solids* **353**, 4515–4517 (2007).
23. Moyer, J., Wilson, D., Finkelshtein, I., Wong, B., Potts, R. Correlation between sweat glucose and blood glucose in subjects with diabetes. *Diabetes Technol. Ther.* **14**, 398–402(2012).
24. Saraoğlu, H. M., Koçan, M. A study on non-invasive detection of blood glucose concentration from human palm perspiration by using artificial neural networks. *Expert Syst.* **27**, 156–165 (2010).
25. Derbyshire, P. J., Barr, H., Davis, F., Higson, S. P. Lactate in human sweat: a critical review of research to the present day. *J. Physiol. Sci.* **62**, 429–440 (2012).
26. Polliack, A., Taylor, R., Bader, D. L. Analysis of sweat during soft tissue breakdown following pressure ischemia. *J. Rehabil. Res. Develop.* **30**, 250–259 (1993).
27. Taylor, R. P., Polliack, A. A., Bader, D. L. The analysis of metabolites in human sweat: analytical methods and potential application to investigation of pressure ischaemia of soft tissues. *Ann. Clin. Biochem.* **31**, 18–24 (1994).
28. Polliack, A., Taylor, R., Bader, D. L. Sweat analysis following pressure ischaemia in a group of debilitated subjects. *J. Rehabil. Res. Dev.* **34**, 303–308 (1997).
29. Knight, S. L., Taylor, R. P., Polliack, A. A., Bader, D. L. Establishing predictive indicators for the status of loaded soft tissues. *J. Appl. Physiol.* **90**, 2231–2237 (2001).
30. Ament, W. *et al.* Lactate and ammonia concentration in blood and sweat during incremental cycle ergometer exercise. *Int. J. Sports Med.* **18**, 35–39 (1997).
31. Alvear-Ordenes, I., Garcia-Lopez, D., De Paz, J., Gonzalez-Gallego, J. Sweat lactate, ammonia, and urea in rugby players. *Int. J. Sports Med.* **26**, 632–637 (2005).
32. Kukumberg, P. *et al.* Sweat: a potential marker of clinical activity in panic disorder. *Neuroendocrin. Lett.* **30**, 400–402 (2009).
33. Laccourreye, O., Bernard, D., Lacharriere, O. D., Bazin, R., Brasnu, D. Frey's syndrome analysis with biosensor: a preliminary study. *Arch. Otolaryngol. Head Neck Surg.* **119**, 940–944 (1993).
34. Webb, R. C. *et al.* Ultrathin conformal devices for precise and continuous thermal characterization of human skin. *Nature Mater.* **12**, 938–944 (2013).
35. Sprigle, S., Linden, M., McKenna, D., Davis, K., Riordan, B. Clinical skin temperature measurement to predict incipient pressure ulcers. *Adv. Skin Wound Care* **14**, 133–137 (2001).
